# Supplementary material
Source: Springer Nature journal article supplement (https://www.springermedizin.de/resource/supplementary/12889_2010_3362_MOESM1_ESM.PDF/9488872)

**Additional file 1.** Map of the health areas (sub districts) of the district of Kolokani, Mali. Intervention areas are indicated in red.

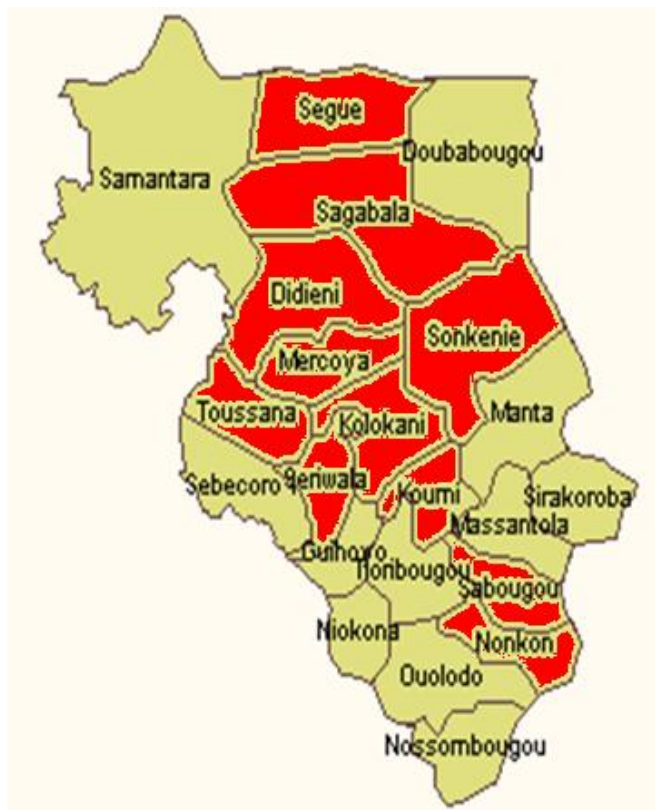

Supplement: MOESM1 [file 9488872]
